# Supplementary material for: Rational Design of Toxoid Vaccine Candidates for Staphylococcus aureus Leukocidin AB (LukAB)
Source: MDPI journal article supplement (doi:10.3390/toxins11060339), 2019-06-14
Supplement: s1 [file s1]

## Supplementary Materials: Rational Design of Toxoid Vaccine Candidates for *Staphylococcus aureus* Leukocidin AB (LukAB)

Shweta Kailasan, Thomas Kort, Ipsita Mukherjee, Grant C. Liao, Tulasikumari Kanipakala, Nils Williston, Nader Ganjbaksh, Arundhathi Venkatasubramaniam, Frederick W. Holtsberg, Hatice Karauzum, Rajan P. Adhikari and M. Javad Aman

**Table S1.** Comparison of expression using pET Duet versus pET24a (+) dual plasmid system.

| Vector    | IPTG Concentration (mM) | Growth/ Induction Temperature (°C) | Total Yield (mg/L) | EC50 from PMN-Based Toxicity Assay (nM) |
|-----------|-------------------------|------------------------------------|--------------------|-----------------------------------------|
| pET Duet  | 0.3                     | 37/25                              | 19.84              | 0.1                                     |
| pET24a(+) | 0.3                     | 37/25                              | 20.5               | 0.09                                    |

Abbreviations: IPTG (Isopropyl  $\beta$ -D-1-thiogalactopyranoside); PMN (Polymononuclear neutrophils)

**Table S2.** Bacterial Strains.

| Strain                                                   | Genotype/Description                                 | Source                                     |
|----------------------------------------------------------|------------------------------------------------------|--------------------------------------------|
| JE2                                                      | USA300 WT from Nebraska mutant library               | NARSA repository                           |
| MRSA252, MN8, NCTC 8325, MRSACOL, USA200, USA100, MNHOCH | Standard SA strain                                   | NARSA repository                           |
| MRSA ST-80                                               | Standard SA strain                                   | From Dr. Jean Lee, BWH, Harvard University |
| USA300 (NRS384)                                          | Community MRSA strain                                | NARSA repository                           |
| USA1000, SF8300 and isogenic LukAB mutant                | Community MRSA strain and it's isogenic LukAB mutant | From Dr. Binh Diep, UCSF                   |

Abbreviations: SA (*Staphylococcus aureus*); MRSA (multi-drug resistant SA)

| <b>LukA<sub>wt</sub></b>                                                                                                                                                                    |     | <b>LukB<sub>wt</sub></b>                                                                                                                                                                    |     |
|---------------------------------------------------------------------------------------------------------------------------------------------------------------------------------------------|-----|---------------------------------------------------------------------------------------------------------------------------------------------------------------------------------------------|-----|
| <b><i>MKNKKRVLIA SLSLCAILL SAATTQANSA</i></b>                                                                                                                                               |     | <b><i>MIKQLYKNIT ICTLALSTTF TVLPATSEAK</i></b>                                                                                                                                              | 1   |
| :* *****: *::*****                                                                                                                                                                          |     | * *                                                                                                                                                                                         |     |
| <b><i>HKDSQDQNK EHVDSQQKD KRNVTNKDKN</i></b>                                                                                                                                                | 33  | <b><i>INSEIKQVSE <span style="background-color: yellow;">K</span>NLDGDT<span style="background-color: yellow;">M</span>Y <span style="background-color: blue;">T</span>TATTSDSQ</i></b>     | 31  |
| *****:**** ** * * :* :*                                                                                                                                                                     |     | *:**** :* **::**** ***** **:                                                                                                                                                                |     |
| <b><i>STAPD<span style="background-color: yellow;">D</span>IGKN GKITK<span style="background-color: yellow;">R</span>TETV YDEKTNI<span style="background-color: yellow;">L</span>QN</i></b> | 63  | <b><i>KNITQSLQFN FLTEPNYDKE TVFIKA<span style="background-color: yellow;">K</span>GTI</i></b>                                                                                               | 61  |
| * . ::* ** ***** **::*****                                                                                                                                                                  |     | *****:** *:: ***** **::** *****                                                                                                                                                             |     |
| <b><i>LQDFDIDDPT <span style="background-color: yellow;">Y</span>DKNVLLVKK QGSIHSNLKF</i></b>                                                                                               | 93  | <b><i>GSGLRILDPN GYWNSTLRWP GSYSVSIQNV</i></b>                                                                                                                                              | 91  |
| ***:** ** *****:***** ** *****                                                                                                                                                              |     | ***** * ***** * * *****:**                                                                                                                                                                  |     |
| <b><i>ESHKEEKNSN WLKYPSEYHV DFQVKRNRKT</i></b>                                                                                                                                              | 118 | <b><i>DDNNNTNVD FAPKNQDESR <span style="background-color: yellow;">E</span>VKYTYGYKT</i></b>                                                                                                | 121 |
| :***** ***** ** **::**** **                                                                                                                                                                 |     | :* :*:** * ***,** ***** **                                                                                                                                                                  |     |
| <b><i>EILDQLPKNK ISTA<span style="background-color: yellow;">K</span>VDSTF SYSSGGKFD</i></b>                                                                                                | 153 | <b><i>GGD<span style="background-color: yellow;">E</span>S<span style="background-color: yellow;">I</span>NRGG <span style="background-color: yellow;">L</span>IGNITKESN YSETISYQQP</i></b> | 151 |
| ***:** ** ***** **::** *****:*****                                                                                                                                                          |     | .*****. ***** ** * * *****                                                                                                                                                                  |     |
| <b><i>TKGIGRTSSN SYSKTISYNQ QNYDTIASGK</i></b>                                                                                                                                              | 183 | <b><i>SYRTLLDQST SHKGVGWKVE AHLINMG<span style="background-color: yellow;">H</span>D</i></b>                                                                                                | 181 |
| *****: . ***** **::** * . *                                                                                                                                                                 |     | ***** **::** ***** **::*****                                                                                                                                                                |     |
| <b><i>NNNWHVHWSV IAN<span style="background-color: yellow;">D</span>LKYGGE VKNRNDLELF</i></b>                                                                                               | 213 | <b><i>HTRQLTNSD NRTKS<span style="background-color: yellow;">E</span>IFSL <span style="background-color: yellow;">T</span>ENGLWAKD</i></b>                                                  | 211 |
| *****:**:* *****:*** **::*****                                                                                                                                                              |     | ***** *****:***** ** . ** **                                                                                                                                                                |     |
| <b><i>YRNTRIATVE NPELSFASKY RYPALVRSGF</i></b>                                                                                                                                              | 243 | <b><i>NFTPKD<span style="background-color: yellow;">K</span>MPV TVSEGFNPEF LAVMSHDKD</i></b>                                                                                                | 241 |
| ***:***** ***** * ** * ,*                                                                                                                                                                   |     | ** *:* * .*** .**** *::*****                                                                                                                                                                |     |
| <b><i>NPEFLTYLSN EKSNEKTQFE VTYTRNQDIL</i></b>                                                                                                                                              | 273 | <b><i>KGKSQFVVHY KRSMEFKID WNRHGFWGYW</i></b>                                                                                                                                               | 271 |
| * ***** ***** ** *****:***                                                                                                                                                                  |     | :***:***** ** :*****: *****                                                                                                                                                                 |     |
| <b><i>KNRPGIHYAP PILEKNKDGQ RLIVTYEVDW</i></b>                                                                                                                                              | 303 | <b><i>SGENHVDKKE EKLSALYEVD WKTHNVKFKV</i></b>                                                                                                                                              | 301 |
| *** *:** * * *****:*** *****                                                                                                                                                                |     | *****:** ***** ** :** *:***                                                                                                                                                                 |     |
| <b><i>KNKTVKVVDK YSDDNKPYKE G</i></b>                                                                                                                                                       | 324 | <b><i>VLNDNEKK</i></b>                                                                                                                                                                      | 331 |
| :*:* *.*** ::*:: :*                                                                                                                                                                         |     | ** * **                                                                                                                                                                                     |     |

**Figure S1.** Key residue mutations within LukAB. LukA<sub>WT</sub> and LukB<sub>WT</sub> sequences from USA300 strain are shown along with specific mutated residues highlighted in yellow. For LukB, residues crossed out indicate deletion mutations and those colored in blue were substituted with the corresponding residues in HlgB (AEGKITPVSVKKVDDKVTLTKTTATADSD). The leader or signal sequence is shown in bold & italics. Additionally, conservation of residues within LukA<sub>WT</sub> and LukB<sub>WT</sub> variants derived from different strains for which annotated genome data is available is shown below the residues as calculated from a multiple sequence alignment using ClustalOmega (Ref). The symbols indicate conservation of: a single residue (\*), between groups of strongly similar properties - scoring > 0.5 in the Gonnet PAM 250 matrix (:), and between groups of weakly similar properties - scoring ≤ 0.5 in the Gonnet PAM 250 matrix (.).

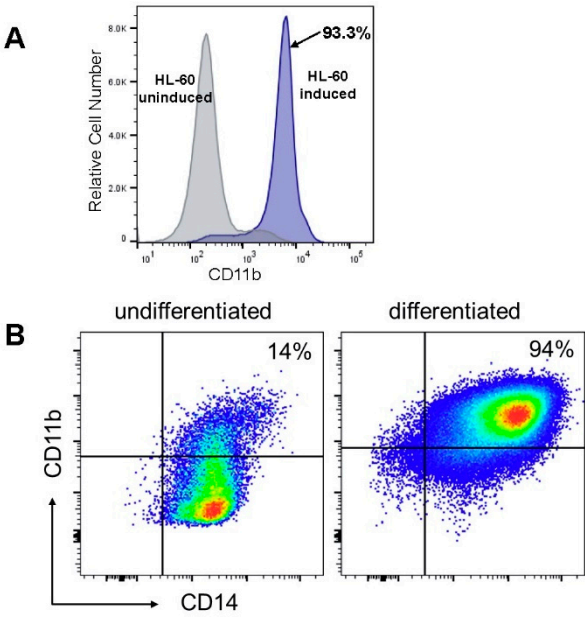

Figure S2. Expression of CD11b and/or CD14 on (A) PMN and (B) THP-1 cells.
